# Supplementary material for: An extensively hydrolysed rice protein-based formula in the management of infants with cow's milk protein allergy: preliminary results after 1 month
Source: PubMed Central journal article supplement — Arch Dis Child. 2014 Jun 9;99(10):933–6. doi: 10.1136/archdischild-2013-304727 (PMC4173818; doi:10.1136/archdischild-2013-304727), 2014-06-09
Supplement: archdischild-2013-304727-s1.pdf [file archdischild-2013-304727-s1.pdf]

**Table (electronic).** Symptom-based score (adapted from references 11, 12, 13)

| Symptom                                   | Score           |                                                                                                                                                                                                                                                                                                                                                                                                                  |  |                 |                      |        |   |   |      |   |   |
|-------------------------------------------|-----------------|------------------------------------------------------------------------------------------------------------------------------------------------------------------------------------------------------------------------------------------------------------------------------------------------------------------------------------------------------------------------------------------------------------------|--|-----------------|----------------------|--------|---|---|------|---|---|
| Crying (°)                                | 0 to 6          | 0 1 hour/day<br>1 1 - 1.5 hours/day<br>2 1.5 - 2 hours/day<br>3 2 to 3 hours/day<br>4 3 to 4 hours/day<br>5 4 to 5 hours/day<br>6 > 5 hours/day                                                                                                                                                                                                                                                                  |  |                 |                      |        |   |   |      |   |   |
| Regurgitation (27)                        | 0 to 6          | 0 0-2 episodes/day<br>1 $\geq 3 - \leq 5$ of small volume<br>2 > 5 episodes of > 1 coffee spoon<br>3. > 5 episodes of $\pm$ half of the feedings in < half of the feedings<br>4 continuous regurgitations of small volumes > 30 min after each feeding<br>5 regurgitation of half to complete volume of a feeding in at least half of the feedings<br>6. regurgitation of the complete volume after each feeding |  |                 |                      |        |   |   |      |   |   |
| Stools<br>(according to Bristol scale-28) | 0 to 6          | 4 type 1 and 2 (hard stools)<br>0 type 3 and 4 (normal stools)<br>2 type 5 (soft stool)<br>4 type 6 (mushy/liquid stool, if unrelated to infection)<br>6 type 7 (watery stools)                                                                                                                                                                                                                                  |  |                 |                      |        |   |   |      |   |   |
| Dermatological symptoms                   | 0 to 6          | Atopic eczema<br><table style="margin-left: auto; margin-right: auto;"> <thead> <tr> <th></th> <th>Head-neck-trunk</th> <th>Arms-hands-legs-feet</th> </tr> </thead> <tbody> <tr> <td>Absent</td> <td>0</td> <td>0</td> </tr> <tr> <td>Mild</td> <td>1</td> <td>1</td> </tr> </tbody> </table>                                                                                                                   |  | Head-neck-trunk | Arms-hands-legs-feet | Absent | 0 | 0 | Mild | 1 | 1 |
|                                           | Head-neck-trunk | Arms-hands-legs-feet                                                                                                                                                                                                                                                                                                                                                                                             |  |                 |                      |        |   |   |      |   |   |
| Absent                                    | 0               | 0                                                                                                                                                                                                                                                                                                                                                                                                                |  |                 |                      |        |   |   |      |   |   |
| Mild                                      | 1               | 1                                                                                                                                                                                                                                                                                                                                                                                                                |  |                 |                      |        |   |   |      |   |   |

|                      |        |                                                                                          |
|----------------------|--------|------------------------------------------------------------------------------------------|
|                      |        | Moderate 2 2                                                                             |
|                      |        | Severe 3 3                                                                               |
|                      | 0 to 6 | Urticaria (no 0 / yes 6)                                                                 |
| Respiratory symptoms | 0 to 3 | 0 no respiratory symptoms<br>1 mild symptoms<br>2 moderate symptoms<br>3 severe symptoms |

***Legend***

(°) Crying was only considered if the child was crying for one week or more, assessed by the parents, without any other obvious cause.
